# Supplementary material for: Exploring the Effect of V2O5 and Nb2O5 Content on the Structural, Thermal, and Electrical Characteristics of Sodium Phosphate Glasses and Glass–Ceramics
Source: MDPI journal article supplement (doi:10.3390/ijms25053005), 2024-03-05
Supplement: s1 [file s1]

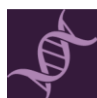

Supplementary Materials

# Exploring the Effect of $V_2O_5$ and $Nb_2O_5$ Content on the Structural, Thermal, and Electrical Characteristics of Sodium Phosphate Glasses-(Ceramics)

Sara Marijan <sup>1</sup>, Marija Mirosavljević <sup>1</sup>, Teodoro Klaser <sup>1</sup>, Petr Mošner <sup>2</sup>, Ladislav Koudelka <sup>2</sup>, Željko Skoko <sup>3</sup>, Jana Pisk <sup>4</sup> and Luka Pavić <sup>1,\*</sup>

## 1. SEM-EDS analysis

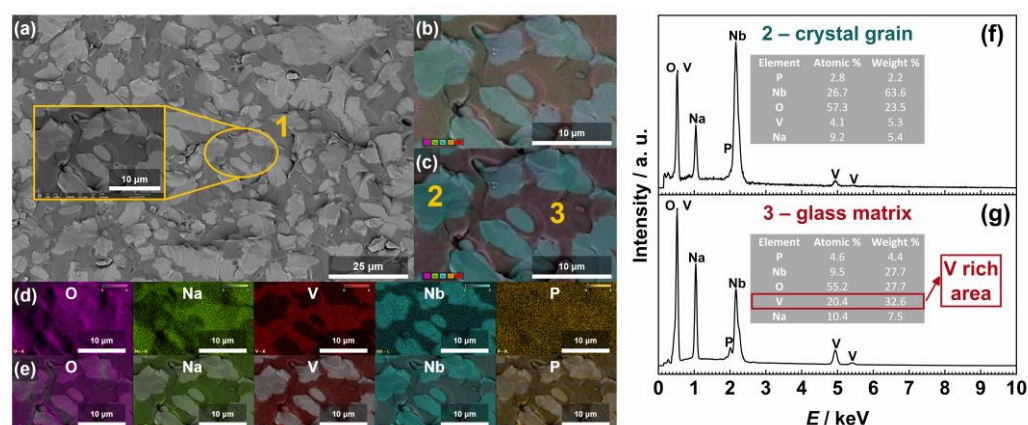

**Figure S1.** (a) SEM micrographs of 25V-35Nb glass-ceramic, (b) count X-ray mapping, (c) quantitative X-ray mapping, (d) count and (e) quantitative elemental mapping of O, Na, V, Nb and P from a selected area of the given glass-ceramic, (f, g) EDS spectra from selected areas of 25V-35Nb glass-ceramic.

## 2. Vibrational spectroscopy – Raman and IR-ATR studies

**Table S1.** Assignment of Raman and IR-ATR bands.

| $\nu$ (cm <sup>-1</sup> ) |               |           |                | Assignment                                                                                                         |
|---------------------------|---------------|-----------|----------------|--------------------------------------------------------------------------------------------------------------------|
| Raman                     | Ref.          | IR-ATR    | Ref.           |                                                                                                                    |
| 60–90                     | [1]           | -         | -              | translational modes of the Na <sup>+</sup> cation                                                                  |
| 240–280                   | [2–4]         | -         | -              | distortion of octahedral NbO <sub>6</sub>                                                                          |
| 270–285,<br>365–380       | [2–5]         | 400–600   | [6,7]          | $\delta(\text{O}=\text{P}-\text{O})$ and $\delta(\text{O}-\text{P}-\text{O})$                                      |
| 450                       | [1,2,4,8]     | 420–530   | [6,9,10]       | P–O–Nb bonding                                                                                                     |
| 450–550                   | [24]          | 450–550   | [18,25–28]     | $\nu(\text{V}-\text{O}-\text{V})$ in metavanadates                                                                 |
| 555, 605                  | [1,2,4,8]     | 530–665   | [6,9,10]       | coupled vibrational modes of intermediate Nb–O and O–P–O bonds                                                     |
| 630–660                   | [2–5,8,11–14] | 630–660   | [13]           | $\nu(\text{Nb}-\text{O})$ in 3D network of slightly distorted octahedral NbO <sub>6</sub> units shared via corners |
| 695                       | [2–5,8,11]    | 675–715   | [6–8,15]       | $\nu_s(\text{P}-\text{O}-\text{P})$ , Q <sup>2</sup>                                                               |
| 640                       | [16,17]       | 640       | [18]           | P–O–V bonding                                                                                                      |
| 735                       | [2–5,8,11]    | 715–755   | [6,8,15]       | $\nu_s(\text{P}-\text{O}-\text{P})$ , Q <sup>1</sup>                                                               |
| 600–700                   | [19]          | 600–700   | [20]           | $\nu(\text{V}-\text{O}-\text{Nb})$                                                                                 |
| 740–770                   | [2–5,8,11–14] | 760       | [13]           | $\nu(\text{Nb}-\text{O}-\text{Nb})$ in corner-shared NbO <sub>6</sub> octahedral units                             |
| 755–780                   | [16]          | 755–800   | [18]           | $\nu(\text{V}-\text{O}-\text{V})$ bridging bond                                                                    |
| -                         | -             | 880–920   | [7,8,14,21,22] | $\nu_{\text{as}}(\text{P}-\text{O}-\text{P})$                                                                      |
| 850                       | [2–5,8,11–14] | 830–860   | [13,23]        | $\nu(\text{Nb}-\text{O}-\text{Nb})$ in NbO <sub>6</sub> octahedra linked into chains                               |
| 945–965                   | [2–5,8,11–14] | 925–975   | [13,23]        | $\nu(\text{Nb}-\text{O})$ in highly distorted octahedral NbO <sub>6</sub> units                                    |
| 955–975                   | [24]          | 950–990   | [18,25–28]     | $\nu(\text{V}=\text{O})$                                                                                           |
| 975–995                   | [4,8,11]      | 975–995   | [6,8]          | $\nu_s(\text{PO}_4^{3-})$ , Q <sup>0</sup>                                                                         |
| 1045–1075                 | [4,8,11]      | 1045–1075 | [6,8,14,22]    | $\nu_{\text{as}}(\text{PO}_4^{3-})$ , Q <sup>0</sup>                                                               |
| 1085–1125                 | [2–4,8,11]    | 1085–1125 | [8,21,22]      | $\nu_s(\text{PO}_3^{2-})$ , Q <sup>1</sup>                                                                         |
| 1135–1155                 | [2–4,8,11]    | 1135–1155 | [8,22]         | $\nu_s(\text{PO}_2^-)$ , Q <sup>2</sup>                                                                            |
| 1185–1225                 | [2–4,8,11]    | 1185–1225 | [8,14,21,22]   | $\nu_{\text{as}}(\text{PO}_3^{2-})$ , Q <sup>1</sup>                                                               |
| 1225–1275                 | [2–4,8,11]    | 1225–1275 | [7,8,22]       | $\nu_{\text{as}}(\text{PO}_2^-)$ , Q <sup>2</sup>                                                                  |

## 2. Scaling properties of conductivity spectra

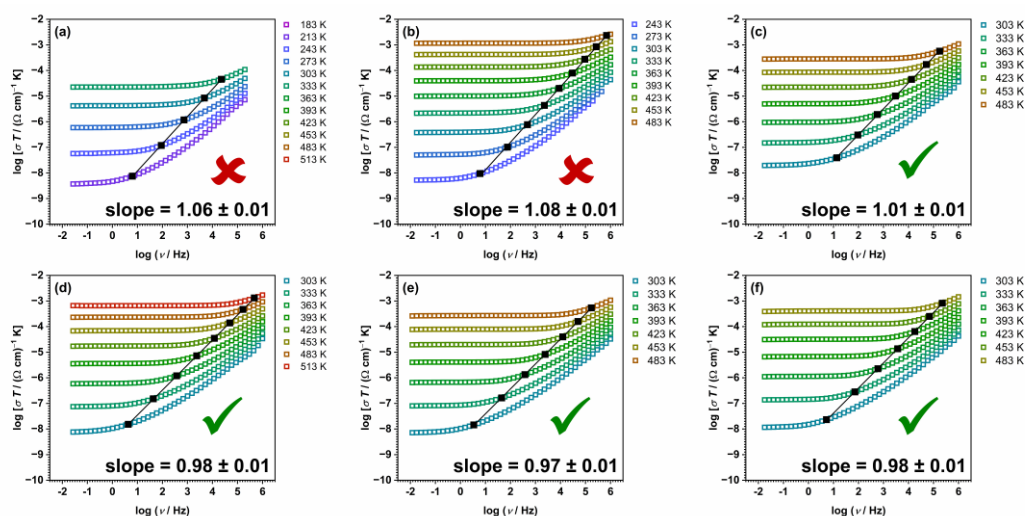

**Figure S2.** Conductivity spectra of (b) 25V-0Nb, (c) 25V-5Nb, (d) 25V-10Nb, (e) 25V-15Nb, (f) 25V-20Nb and (g) 25V-25Nb glass samples. The onset frequencies of conductivity dispersion, as defined by the equation  $\sigma'(\nu_0) = 2\sigma_{DC}$ , are represented by full black square symbols, while the straight black lines are obtained by linear regression of the  $\log(\sigma'T)$  vs  $\log\nu_0$  dependence.

## References

- Benyounoussy, S.; Bih, L.; Muñoz, F.; Rubio-Marcos, F.; Naji, M.; El Bouari, A. Structure, Dielectric, and Energy Storage Behaviors of the Lossy Glass-Ceramics Obtained from  $\text{Na}_2\text{O-Nb}_2\text{O}_5\text{-P}_2\text{O}_5$  Glassy-System. *Phase Transit.* **2021**, *94*, 634–650. <https://doi.org/10.1080/01411594.2021.1949458>.
- Flambard, A.; Videau, J.J.; Delevoye, L.; Cardinal, T.; Labrugère, C.; Rivero, C.A.; Couzi, M.; Montagne, L. Structure and Non-linear Optical Properties of Sodium–Niobium Phosphate Glasses. *J. Non-Cryst. Solids* **2008**, *354*, 3540–3547. <https://doi.org/10.1016/j.jnoncrsol.2008.03.017>.
- Benyounoussy, S.; Bih, L.; Muñoz, F.; Rubio-Marcos, F.; EL Bouari, A. Effect of the  $\text{Na}_2\text{O-Nb}_2\text{O}_5\text{-P}_2\text{O}_5$  Glass Additive on the Structure, Dielectric and Energy Storage Performances of Sodium Niobate Ceramics. *Heliyon* **2021**, *7*, e07113, <https://doi.org/10.1016/j.heliyon.2021.e07113>.
- Razum, M.; Pavić, L.; Ghussn, L.; Moguš-Milanković, A.; Šantić, A. Transport of Potassium Ions in Niobium Phosphate Glasses. *J. Am. Ceram. Soc.* **2021**, *104*, 4669–4678, <https://doi.org/10.1111/jace.17882>.
- Koudelka, L.; Kalenda, P.; Mošner, P.; Montagne, L.; Revel, B. Potassium Niobate-Phosphate Glasses and Glass-Ceramics. *J. Non-Cryst. Solids* **2021**, *572*, 121091. <https://doi.org/10.1016/j.jnoncrsol.2021.121091>.
- Rambo, C.R.; Ghussn, L.; Sene, F.F.; Martinelli, J.R. Manufacturing of Porous Niobium Phosphate Glasses. *J. Non-Cryst. Solids* **2006**, *352*, 3739–3743, <https://doi.org/10.1016/j.jnoncrsol.2006.03.104>.
- Attafi, Y.; Liu, S. Conductivity and Dielectric Properties of  $\text{Na}_2\text{O-K}_2\text{O-Nb}_2\text{O}_5\text{-P}_2\text{O}_5$  Glasses with Varying Amounts of  $\text{Nb}_2\text{O}_5$ . *J. Non-Cryst. Solids* **2016**, *447*, 74–79, <https://doi.org/10.1016/j.jnoncrsol.2016.05.038>.
- Senapati, A.; Barik, S.K.; Venkata Krishnan, R.; Chakraborty, S.; Jena, H. Studies on Synthesis, Structural and Thermal Properties of Sodium Niobium Phosphate Glasses for Nuclear Waste Immobilization Applications. *J. Therm. Anal. Calorim.* **2023**, *148*, 355–369. <https://doi.org/10.1007/s10973-022-11760-3>.
- Wang, B.; Greenblatt, M.; Yan, J. Ionic Conductivities of Crystalline and Glassy  $\text{Na}_4\text{NbP}_3\text{O}_{12}$  and Crystalline  $\text{Na}_6\text{Nb}_2\text{P}_6\text{O}_{23}$ . *Solid State Ionics* **1994**, *69*, 85–89, [https://doi.org/10.1016/0167-2738\(94\)90454-5](https://doi.org/10.1016/0167-2738(94)90454-5).
- Chu, C.M.; Wu, J.J.; Yung, S.W.; Chin, T.S.; Zhang, T.; Wu, F.B. Optical and Structural Properties of Sr–Nb–Phosphate Glasses. *J. Non-Cryst. Solids* **2011**, *357*, 939–945, <https://doi.org/10.1016/j.jnoncrsol.2010.12.009>.

11. Mošner, P.; Hostinský, T.; Koudelka, L. Thermal, Structural and Crystallization Study of  $\text{Na}_2\text{O}-\text{P}_2\text{O}_5-\text{Nb}_2\text{O}_5$  Glasses. *J. Solid State Chem.* **2022**, *316*, 123545. <https://doi.org/10.1016/j.jssc.2022.123545>.
12. Komatsu, T.; Honma, T.; Tasheva, T.; Dimitrov, V. Structural Role of  $\text{Nb}_2\text{O}_5$  in Glass-Forming Ability, Electronic Polarizability and Nanocrystallization in Glasses: A Review. *J. Non-Cryst. Solids* **2022**, *581*, 121414, <https://doi.org/10.1016/j.jnoncrysol.2022.121414>.
13. Iordanova, R.; Milanova, M.; Aleksandrov, L.; Shinozaki, K.; Komatsu, T. Structural Study of  $\text{WO}_3-\text{La}_2\text{O}_3-\text{B}_2\text{O}_3-\text{Nb}_2\text{O}_5$  Glasses. *J. Non-Cryst. Solids* **2020**, *543*, 120132, <https://doi.org/10.1016/j.jnoncrysol.2020.120132>.
14. Karam, L.; Adamietz, F.; Rodriguez, V.; Bondu, F.; Lepicard, A.; Cardinal, T.; Fargin, E.; Richardson, K.; Dussauze, M. The Effect of the Sodium Content on the Structure and the Optical Properties of Thermally Poled Sodium and Niobium Borophosphate Glasses. *J. Appl. Phys. (Melville, NY, U. S.)* **2020**, *128*, 043106, <https://doi.org/10.1063/5.0013383>.
15. Teixeira, Z.; Alves, O.L.; Mazali, I.O. Structure, Thermal Behavior, Chemical Durability, and Optical Properties of the  $\text{Na}_2\text{O}-\text{Al}_2\text{O}_3-\text{TiO}_2-\text{Nb}_2\text{O}_5-\text{P}_2\text{O}_5$  Glass System. *J. Am. Ceram. Soc.* **2007**, *90*, 256–263, <https://doi.org/10.1111/j.1551-2916.2006.01399.x>.
16. Chrissanthopoulos, A.; Pouchan, C.; Papatheodorou, G.N. Structural Investigation of Vanadium-Sodium Metaphosphate Glasses. *Zeitschrift für Naturforschung A* **2001**, *56*, 773–776, <https://doi.org/10.1515/zna-2001-1114>.
17. Hejda, P.; Holubová, J.; Černošek, Z.; Černošková, E. The Structure and Properties of Vanadium Zinc Phosphate Glasses. *J. Non-Cryst. Solids* **2017**, *462*, 65–71, <https://doi.org/10.1016/j.jnoncrysol.2017.02.012>.
18. Du, M.; Huang, K.; Guo, Y.; Xie, Z.; Jiang, H.; Li, C.; Chen, Y. High Specific Capacity Lithium Ion Battery Cathode Material Prepared by Synthesizing Vanadate–Phosphate Glass in Reducing Atmosphere. *J. Power Sources* **2019**, *424*, 91–99, <https://doi.org/10.1016/j.jpowsour.2019.03.106>.
19. Zhao, Z.; Gao, X.; Wachs, I.E. Comparative Study of Bulk and Supported V–Mo–Te–Nb–O Mixed Metal Oxide Catalysts for Oxidative Dehydrogenation of Propane to Propylene. *J. Phys. Chem. B* **2003**, *107*, 6333–6342, <https://doi.org/10.1021/jp021640m>.
20. Srikumar, T.; Srinvasa Rao, Ch.; Gandhi, Y.; Venkatramaiah, N.; Ravikumar, V.; Veeraiah, N. Microstructural, Dielectric and Spectroscopic Properties of  $\text{Li}_2\text{O}-\text{Nb}_2\text{O}_5-\text{ZrO}_2-\text{SiO}_2$  Glass System Crystallized with  $\text{V}_2\text{O}_5$ . *J. Phys. Chem. Solids* **2011**, *72*, 190–200, <https://doi.org/10.1016/j.jpcs.2010.12.009>.
21. Rao, K.J.; Sobha, K.C.; Kumar, S. Infrared and Raman Spectroscopic Studies of Glasses with NASICON-Type Chemistry. *J. Chem. Sci. (Berlin, Ger.)* **2001**, *113*, 497–514, <https://doi.org/10.1007/BF02708786>.
22. Ferreira, B.; Fargin, E.; Manaud, J.P.; Flem, G.L.; Rodriguez, V.; Buffeteau, T. Second Harmonic Generation Induced by Poling in Borophosphate Bulk and Thin Film Glasses. *J. Non-Cryst. Solids* **2004**, *343*, 121–130, <https://doi.org/10.1016/j.jnoncrysol.2004.07.010>.
23. Pereira, R.R.; Aquino, F.T.; Ferrier, A.; Goldner, P.; Gonçalves, R.R. Nanostructured Rare Earth Doped  $\text{Nb}_2\text{O}_5$ : Structural, Optical Properties and Their Correlation with Photonic Applications. *J. Lumin.* **2016**, *170*, 707–717, <https://doi.org/10.1016/j.jlumin.2015.08.068>.
24. Ardelean, I.; Rusu, D.; Andronache, C.; Ciobotă, V. Raman Study of  $x\text{MeO} \cdot (100-x)[\text{P}_2\text{O}_5-\text{Li}_2\text{O}]$  ( $\text{MeO} \Rightarrow \text{Fe}_2\text{O}_3$  or  $\text{V}_2\text{O}_5$ ) Glass Systems. *Mater. Lett.* **2007**, *61*, 3301–3304, <https://doi.org/10.1016/j.matlet.2006.11.057>.
25. Dimitrov, V.; Dimitriev, Y. Structure of Glasses in  $\text{PbO}-\text{V}_2\text{O}_5$  System. *J. Non-Cryst. Solids* **1990**, *122*, 133–138, [https://doi.org/10.1016/0022-3093\(90\)91058-Y](https://doi.org/10.1016/0022-3093(90)91058-Y).
26. Hayakawa, S.; Yoko, T.; Sakka, S. IR and NMR Structural Studies on Lead Vanadate Glasses. *J. Non-Cryst. Solids* **1995**, *183*, 73–84, [https://doi.org/10.1016/0022-3093\(94\)00652-0](https://doi.org/10.1016/0022-3093(94)00652-0).
27. Assem, E.E.; Elmehasseb, I. Structure, Magnetic, and Electrical Studies on Vanadium Phosphate Glasses Containing Different Oxides. *J. Mater. Sci.* **2011**, *46*, 2071–2076, <https://doi.org/10.1007/s10853-010-5040-0>.

28. Rair, D.; Rochdi, A.; Majjane, A.; Jermoumi, T.; Chahine, A.; Touhami, M.E. Synthesis and Study by FTIR,  $^{31}\text{P}$  NMR and Electrochemical Impedance Spectroscopy of Vanadium Zinc Phosphate Glasses Prepared by Sol–Gel Route. *J. Non-Cryst. Solids* **2016**, *432*, 459–465, <https://doi.org/10.1016/j.jnoncrysol.2015.11.001>.

**Disclaimer/Publisher's Note:** The statements, opinions and data contained in all publications are solely those of the individual author(s) and contributor(s) and not of MDPI and/or the editor(s). MDPI and/or the editor(s) disclaim responsibility for any injury to people or property resulting from any ideas, methods, instructions or products referred to in the content.
